1 **Association Between the Swallowing Reflex and the Development of Aspiration**

2 **Pneumonia in Patients with Dysphagia Admitted to Long-term Care Wards**

3 **-A Prospective Cohort Study of 60 Days-**

4

5 Tomoya Omura, M.S.<sup>1,2</sup>, Miwa Matsuyama, Ph.D.<sup>3</sup>, Shota Nishioka<sup>2</sup>, Shomu Sagawa<sup>2</sup>,

6 Masaya Seto<sup>2</sup> and Mitsugu Naoe<sup>2</sup>

7

8 1. Department of Oral Health Care and Rehabilitation, Doctor's Course of Oral Health

9 Science Graduate School of Oral Sciences, Tokushima University

10 2. Department of Rehabilitation, Naruto-Yamakami Hospital

11 3. Department of Oral Health Care and Rehabilitation, Institute of Health Biosciences,

12 Tokushima University Graduate School

13

14

15

16

17

18

19

## Abstract

20

21 **Objective:** To investigate the association between the simple swallowing provocation  
22 test (SSPT) and development of aspiration pneumonia in patients with dysphagia in  
23 long-term care (LTC) wards.

24 **Design:** The study design was a prospective cohort study. Subjects were followed for 60  
25 days from admission.

26 **Setting:** LTC wards.

27 **Participants:** Study subjects were patients with dysphagia aged 65 years or older who  
28 were admitted to LTC wards between August 2018 and August 2019. In total, 39  
29 subjects were included in the analysis (20 males, 19 females; mean age  $83.8 \pm 8.5$  years).

30 Subjects were divided into two groups based on SSPT results: normal swallowing reflex  
31 (SSPT normal group) and abnormal swallowing reflex (SSPT abnormal group). The  
32 covariates were age and sex, primary disease, history of cerebrovascular disease,  
33 Glasgow coma scale, body mass index, geriatric nutritional risk index, the mann  
34 assessment of swallowing ability, food intake level scale, functional independence  
35 measure, and oral health assessment tool.

36 **Interventions:** Not applicable.

37 **Main Outcome Measure:** The outcome was the incidence of aspiration pneumonia  
38 during the first 60 days of hospitalization, and the predictive factor was SSPT: 0.4 ml.

39 **Results:** The incidence of aspiration pneumonia was 33.3% in the SSPT normal group  
40 and 76.2% in the SSPT abnormal group. The phi coefficient was -0.43, the risk ratio  
41 was 2.29, and the 95% confidence interval (95%CI) was 1.14 to 4.58. The predictive  
42 factor for aspiration pneumonia was SSPT: 0.4 ml (95% CI: 1.57–26.03).

43 **Conclusions:** Our findings suggest that the SSPT provides a valid index for the  
44 development of aspiration pneumonia in older patients with dysphagia admitted to LTC  
45 wards.

46

47 **Key Words:** cohort study · Long-term care · deglutition disorders · Aspiration  
48 pneumonia

49

50

51

### List of abbreviations

52 SSPT: the simple swallowing provocation test, LTC: long-term care, ADL: activities of  
53 daily living, NHCAP: nursing and healthcare-associated pneumonia, MASA: the mann  
54 assessment of swallowing ability, GCS: glasgow coma scale, FILS: food intake level

55 scale, BMI: body mass index, GNRI: geriatric nutritional risk index, FIM: functional  
56 independence measure, OHAT: oral health assessment tool, CI: confidence interval

57

58

59

## Introduction

60 Aspiration pneumonia is a common disease associated with older patients with  
61 dysphagia, and mortality is increasing <sup>1</sup>. Aspiration pneumonia has a high recurrence  
62 rate, resulting in decreased swallowing function and diminished activities of daily living  
63 (ADL). Additionally, aspiration pneumonia leads to poor outcomes such as prolonged  
64 hospital stays and increased mortality <sup>2-5</sup>. Therefore, detecting patients at risk of  
65 developing aspiration pneumonia early in hospitalization is important for subsequent  
66 prevention.

67

68 Various reports have been published on risk factors related to aspiration  
69 pneumonia <sup>6-9</sup>. Among them, a review by Martino et al. reported that the risk of  
70 pneumonia was 3.17 times higher in patients with dysphagia than in patients without  
71 dysphagia, and 11.56 times higher in patients with dysphagia with aspiration <sup>10</sup>.  
72 Dysphagia is an important risk factor for aspiration pneumonia <sup>11, 12</sup>, and the presence of

73 silent aspiration is known to increase the risk of aspiration pneumonia<sup>13, 14</sup>. Therefore,  
74 the detection of aspiration and silent aspiration is important for predicting aspiration  
75 pneumonia.

76

77 Swallowing screening is performed to detect dysphagia and aspiration at  
78 admission, and the efficacy of some swallowing screening tests has been validated<sup>15-17</sup>.  
79 However, swallowing screening is not sufficient to detect silent aspiration<sup>18</sup>. The simple  
80 swallowing provocation test (SSPT) developed by Teramoto et al. is superior to other  
81 swallowing screens in evaluating the abnormal in the swallowing reflex and detecting  
82 silent aspiration<sup>19-21</sup>. Additionally, it allows aspiration pneumonia to be predicted<sup>21</sup>.  
83 The accuracy of predicting aspiration pneumonia is higher with SSPT than with the  
84 water swallowing test<sup>22</sup>. Previous studies have found an association between the SSPT  
85 and aspiration pneumonia in patients with acute ischemic stroke and residents of a  
86 geriatric health services facility<sup>23, 24</sup>. However, there have been no studies on the  
87 association between the SSPT and aspiration pneumonia in long-term care (LTC) wards  
88 that in Japan provide long-term care for older adults with severe physical and cognitive  
89 problems under the national healthcare insurance system. Patients in LTC wards are  
90 generally admitted from acute/subacute hospital wards after acute treatments, or from

91 home due to exacerbation of their disease conditions. Japanese LTC wards are  
92 comparable to skilled nursing homes in Western countries <sup>25</sup>. Pneumonia in older  
93 patients hospitalized in LTC wards is called nursing and healthcare-associated  
94 pneumonia (NHCAP, the Japanese version of healthcare-associated pneumonia) <sup>26</sup>, and  
95 63% of cases have been reported to be associated with aspiration <sup>27</sup>. A previous study  
96 reported that all patients who developed NHCAP in LTC wards had dysphagia <sup>28</sup>. It is  
97 presumed that patients with dysphagia admitted to LTC wards are more likely to  
98 develop aspiration pneumonia. Therefore, prediction of aspiration pneumonia is  
99 important for patients with dysphagia in LTC wards.

100

101 In this study, we aimed to clarify the association between the SSPT and  
102 aspiration pneumonia at the time of admission in patients with dysphagia admitted to  
103 LTC wards, and examined whether the SSPT can predict aspiration pneumonia.

104

105

106

## Methods

### 107 *Study Design*

108 The study design was a prospective cohort study. Subjects were registered as a

109 cohort on admission and were followed for 60 days from admission.

110

### 111 *Subjects*

112 Study subjects were patients with dysphagia aged 65 years or older who were  
113 admitted to LTC wards from August 2018 to August 2019. Dysphagia was determined  
114 by the mann assessment of swallowing ability (MASA)<sup>29</sup> at admission. The total score  
115 of the MASA is 200 points, and the cutoff value is 177 points. The results of the MASA  
116 are interpreted as no abnormality ( $\geq 178$ ), mild dysphagia (168–177), moderate  
117 dysphagia (139–167), and severe dysphagia ( $\leq 138$ ). Subjects with 177 point or lower  
118 were registered as part of the cohort. Exclusion criteria were subjects who were  
119 discharged within 60 days, subjects with missing data, and subjects who were not  
120 assessed within 1 month of admission. This study was conducted with the approval of  
121 the Naruto Yamakami Hospital Ethics Committee (1-1-01). Informed consent was  
122 obtained in writing from the subjects. It was also obtained from an alternate in the case  
123 of subjects with communication difficulties. The analysis was conducted with  
124 consideration of protecting patients' personal information.

125

126 The sample size was calculated based on the difference in the incidence of

127 aspiration pneumonia between the SSPT abnormal group and the normal group in a  
128 previous study of a geriatric health services facility <sup>24</sup>. The incidence of aspiration  
129 pneumonia was set at a power level of 80% and a significance level of 5%, assuming a  
130 normal group (30%) and an abnormal group (75%). It required 18 subjects in each  
131 group, making a total of 36 subjects. Exclusion criteria were subjects discharged within  
132 60 days of admission and subjects with missing data.

133

#### 134 ***Outcome Measure***

135 The primary outcome measure was the incidence of aspiration pneumonia  
136 during the first 60 days after hospitalization. Aspiration pneumonia was diagnosed by a  
137 physician based on the Clinical Practice Guidelines for Nursing- and  
138 Healthcare-associated Pneumonia <sup>26</sup>.

139

#### 140 ***Assessment Items***

141 The predictive factor was an SSPT with 0.4 ml water (SSPT: 0.4 ml). In  
142 previous studies, the SSPT was a two-step method based on the response to 0.4ml water  
143 with an additional test with 2 ml <sup>21</sup>. However, in this study, the response to 0.4ml water  
144 alone was used to simplify the examination and the result determination. The SSPT was



145 conducted as described by Teramoto et al. <sup>20, 21</sup>. SSPT measurements were performed  
146 with the patient in a supine position. A 5Fr feeding catheter<sup>a</sup> (outside diameter 1.7 mm,  
147 length 40 cm) was inserted nasally for about 13 cm and placed in the oropharynx. The  
148 swallowing reflex was induced by bolus injection of 0.4 ml of distilled water. The water  
149 bolus injection was administered near the end of expiration. The latent time from the  
150 beginning of the water bolus injection to the onset of swallowing (i.e., laryngeal  
151 elevation) was measured with a stopwatch. The swallowing reflex was confirmed by  
152 visual inspection of laryngeal elevation. The cutoff was set to 3 seconds. A swallowing  
153 reflex observed within 3 seconds was classified as normal, and no reflex within  
154 3 seconds was classified as abnormal. A total of three trials were performed, and the  
155 average of two short latencies was used. The covariates were age and sex, primary  
156 disease, history of cerebrovascular disease, Glasgow coma scale (GCS), MASA, food  
157 intake level scale (FILS) <sup>30</sup>, body mass index (BMI), geriatric nutritional risk index  
158 (GNRI, nutrition index of older adults) <sup>31</sup>, functional independence measure (FIM, ADL  
159 index), oral health assessment tool (OHAT, index of oral condition) <sup>32</sup>. All (covariates)  
160 data were assessed within 1 month of admission.

161

162 ***Statistical Analysis***

163           Subjects were divided into two groups: those with a normal swallowing reflex  
164 (SSPT normal group) and those with an abnormal swallowing reflex (SSPT abnormal  
165 group) based on the SSPT results. Descriptive statistics were performed after data  
166 acquisition, and we performed comparisons between the two groups for each  
167 assessment item. Multivariate analysis was used to extract predictive factors associated  
168 with aspiration pneumonia. Mann–Whitney U tests, Fisher's exact test, and chi-square  
169 tests were used for comparisons between the two groups. Chi-square tests were also  
170 used to calculate the phi coefficient, risk ratio, and 95% confidence interval (95%CI)  
171 between SSPT: 0.4 ml and aspiration pneumonia. Predictive factors were extracted by  
172 logistic regression analysis, with aspiration pneumonia as the objective variable. SSPT:  
173 0.4 ml and assessment items that showed a significant difference between the two  
174 groups were used as explanatory variables.

175

176           We also calculated the sensitivity, specificity, and positive predictive value of  
177 SSPT: 0.4 ml to confirm the prediction accuracy of aspiration pneumonia. We used IBM  
178 SPSS Statistics version 25<sup>b</sup> for statistical analyses, with the significance level set at  
179 < 5%.

180

181

182

## Results

183           We enrolled 54 consecutive patients with dysphagia who were hospitalized  
184 during the study period. Subjects excluded were those who were discharged within 60  
185 days of admission (n = 7), those with missing data (n = 3), and those who were not  
186 assessed within 1 month of admission (n = 5). In total, 39 subjects were included in the  
187 analysis (20 males, 19 females; mean age  $83.8 \pm 8.5$  years). Eighteen cases were  
188 allocated to the SSPT normal group, and 21 cases were allocated to the SSPT abnormal  
189 group.

190

191           Twenty-two subjects (56.4%) developed aspiration pneumonia within 60 days  
192 of hospitalization. There was a significant difference in the incidence of aspiration  
193 pneumonia between the two groups. The incidence rate was 33.3% (6 cases) in the  
194 SSPT normal group and 76.2% (16 cases) in the SSPT abnormal group (Fig. 1).

195 Fig.1 Incidence of aspiration pneumonia

196

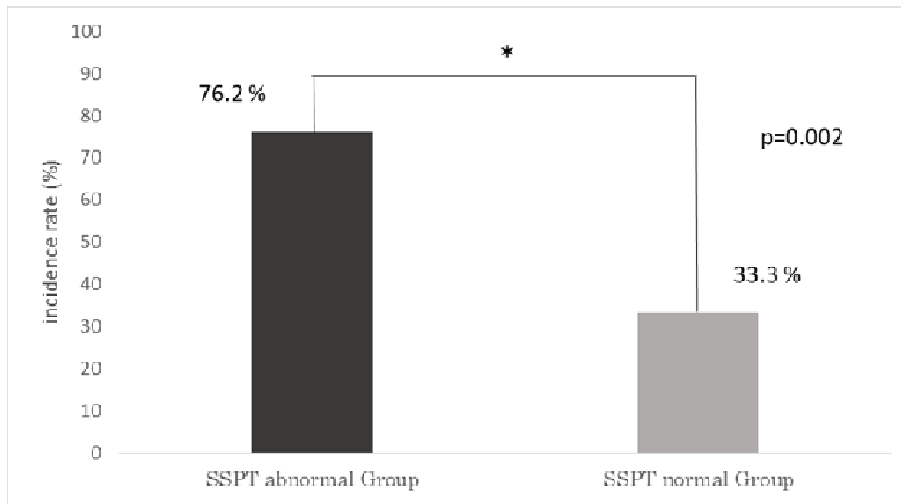

197 Comparison between the two groups revealed significant differences in the assessment  
 198 items of age, sex, and primary disease (disuse syndrome was more common in the SSPT  
 199 normal group) (Table 1).

Table 1 Subjects' basic attributes

|                                | Total<br>(n = 39) | SSPT abnormal group<br>(n = 21) | SSPT normal group<br>(n = 18) | p-value |
|--------------------------------|-------------------|---------------------------------|-------------------------------|---------|
| Age (years), mean ± SD         | 83.8 ± 8.5        | 81.1 ± 8.6                      | 86.9 ± 7.3                    | 0.032   |
| Sex (n), male/female           | 20/19             | 15/6                            | 5/13                          | 0.007   |
| Primary disease                |                   |                                 |                               | 0.018   |
| Cerebrovascular disease, n (%) | 15 (38%)          | 10 (48%)                        | 5 (28%)                       | 0.204   |
| Disuse syndrome, n (%)         | 17 (44%)          | 5 (24%)                         | 12 (67%)                      | 0.007   |
| Parkinson's disease, n (%)     | 2 (5%)            | 2 (10%)                         | 0 (0%)                        | 0.490   |

|                                                 |                  |                  |                  |       |
|-------------------------------------------------|------------------|------------------|------------------|-------|
| Cancer, n (%)                                   | 1 (3%)           | 0 (0%)           | 1 (6%)           | 0.462 |
| Chronic obstructive pulmonary disease, n (%)    | 2 (5%)           | 2 (10%)          | 0 (0%)           | 0.490 |
| Orthopedic disease, n (%)                       | 2 (5%)           | 2 (10%)          | 0 (0%)           | 0.490 |
| History of cerebrovascular disease<br>Yes/No, n | 22/17            | 11/10            | 11/7             | 0.584 |
| GCS, median (range)                             | 13 (11–14)       | 13 (11–4)        | 12 (11–14)       | 0.876 |
| MASA, median (range)                            | 140 (94–151)     | 134 (92–147)     | 141 (110–151)    | 0.499 |
| FILS, median (range)                            | 2 (2–7)          | 2 (2–7)          | 3 (2–6)          | 0.770 |
| BMI, median (range)                             | 18.0 (16.1–19.5) | 18.1 (16.8–19.3) | 18.0 (16.0–21.6) | 0.833 |
| GNRI, median (range)                            | 76.5 (66.5–83.5) | 79.2 (67.6–92.3) | 70.5 (65.5–85.7) | 0.220 |
| FIM (score), median (range)                     | 23 (18–32)       | 23 (18–35)       | 20 (18–30)       | 0.852 |
| OHAT (score), median (range)                    | 6 (4–8)          | 6 (4–8)          | 6 (3–7)          | 0.487 |

200

201 The phi coefficient was -0.43, the risk ratio was 2.29, and the 95%CI was 1.14 to 4.58

202 for the SSPT abnormal group (Table 2).

Table 2. Phi coefficient and risk ratios for aspiration pneumonia

| Aspiration pneumonia | p-value | Phi coefficient | Risk ratio | 95%CI |
|----------------------|---------|-----------------|------------|-------|
|----------------------|---------|-----------------|------------|-------|

---

|                     | Onset      | non-onset  |       |       |      |           |
|---------------------|------------|------------|-------|-------|------|-----------|
| SSPT abnormal Group |            |            |       |       |      |           |
| n=21 (53.8%)        | 16 (76.2%) | 5 (23.8%)  | 0.007 | -0.43 | 2.29 | 1.14-4.58 |
| SSPT normal Group   |            |            |       |       |      |           |
| n=18 (46.2%)        | 6 (33.3%)  | 12 (66.7%) | 0.007 | -0.43 | 0.36 | 0.16-0.82 |

---

203

204 Logistic regression analysis showed that SSPT: 0.4 ml was a predictive factor associated  
205 with aspiration pneumonia. The odds ratio was 6.40 and the 95%CI was 1.57–26.03  
206 (Table 3).

Table 3. Predictive factors associated with aspiration pneumonia

---

|               | Regression coefficient | p-value | Odds ratio | 95%CI        |
|---------------|------------------------|---------|------------|--------------|
| SSPT abnormal | 1.86                   | 0.01    | 6.40       | 1.57 - 26.03 |

---

207 Objective variable: Aspiration pneumonia

208 Explanatory variables: SSPT: 0.4 ml, Age, Sex, Primary disease

209

210 The prediction accuracy of SSPT: 0.4 ml for aspiration pneumonia was 73% sensitivity,

211 71% specificity, and 76% positive predictive value (Table 4).

Table 4 Predictive accuracy of aspiration pneumonia

SSPT: 0.4 ml (%)

|                      | Sensibility | Specificity | Positive predictive value |
|----------------------|-------------|-------------|---------------------------|
| Aspiration pneumonia | 73          | 71          | 76                        |

212

213

214

### Discussion

215

216

217

218

219

220

221

222

223

224

225

226

The SSPT measures the swallowing reflex with a small amount of water injected through a 5Fr feeding catheter inserted nasally 13 cm into the oropharynx<sup>20,21</sup>. This test can detect the risk of silent aspiration<sup>19, 20</sup> and can predict aspiration pneumonia<sup>21, 23, 24</sup>. The SSPT has the advantage of being able to be performed on patients with dementia or communication disorders<sup>33</sup>. However, the disadvantage of SSPT is that it only evaluates the pharyngeal swallowing reflex. In this study, we investigated the association between the swallowing reflex in the SSPT and the development of aspiration pneumonia in older patients with dysphagia after the acute phase by means of a prospective cohort study. The results of this study showed that the development of aspiration pneumonia was 2.3 times higher in patients with an abnormal swallowing reflex in the SSPT than in those a normal swallowing reflex. We hypothesized that the SSPT could be a screening test to predict the development of

227 aspiration pneumonia in older patients with dysphagia after the acute phase.

228

229           Several studies have investigated the association between SSPT and  
230 aspiration pneumonia in patients with acute ischemic stroke and residents of a geriatric  
231 health services facility<sup>23, 24</sup>. In contrast, we examined older patients with dysphagia  
232 after the acute phase with the SSPT and, while our findings supported those of previous  
233 studies, we found that the incidence of aspiration pneumonia was higher than that of  
234 patients with acute ischemic stroke (14%)<sup>23</sup>. It is presumed that the subjects of this  
235 study were patients with many potential risks for aspiration pneumonia at baseline. The  
236 subjects of the previous study were patients with acute ischemic stroke, with a median  
237 age of 73 years, and 54% of the patients were discharged home<sup>23</sup>. The subjects in this  
238 study had a high average age of 83.8 years, with median scores of MASA: 140, FILS: 2,  
239 FIM: 23, and GNRI: 76.5. All had poor swallowing function, ADL, and nutritional  
240 status and required ongoing medical care. Age, dysphagia, low ADL, and malnutrition  
241 have been reported as risk factors for aspiration pneumonia<sup>28, 34, 35</sup>. The subjects in this  
242 study were about 10 years older than those in the previous study and had a number of  
243 risk factors for aspiration pneumonia. Furthermore, the previous study had sensitivity  
244 and specificity of 66.7% and 83.5%, compared with 73% and 71% in this study<sup>23</sup>.



245 Although aspiration does not necessarily lead directly to the development of aspiration  
246 pneumonia<sup>10</sup>, the incidence of aspiration pneumonia increases as the number of risk  
247 factors associated with aspiration pneumonia increases<sup>33</sup>. This suggests that an  
248 abnormal swallowing reflex was more likely to lead to the development of aspiration  
249 pneumonia in the subjects of this study who had many risk factors for aspiration  
250 pneumonia. Therefore, the sensitivity may have been higher than in previous studies.  
251 Hence, in patients at high risk for aspiration pneumonia, the abnormal swallowing  
252 reflex may increase the incidence of aspiration pneumonia.

253

254 In contrast with the previous studies that were retrospective<sup>23, 24</sup>, our study  
255 was a prospective cohort study with a total of 39 cases (18 in the normal group and 21  
256 in the abnormal group). The phi coefficient was -0.43, indicating that the effect size was  
257 sufficient. The width of the 95%CI for the risk ratio was narrow at 3.44, suggesting that  
258 the sample size was appropriate.

259

260 About 80% of patients admitted to LTC wards are over 75 years old<sup>36</sup>, and  
261 72.1% of patients have low ADL levels and need medical care<sup>25</sup>. The demographics of  
262 the subjects in our study were similar to this, with an average age of 83.3 years and low

263 ADL levels. Therefore, it is speculated that many LTC wards have similar  
264 characteristics to this study. The findings in this study may predict the development of  
265 aspiration pneumonia in older patients with dysphagia after the acute phase.

266

### 267 ***Study Limitations***

268 This study has some limitations. First, the SSPT may not adequately detect  
269 the risk of aspiration in patients with a sole or predominant impairment in the oral phase  
270 of swallowing and a relatively intact pharyngeal phase<sup>37</sup>. In fact, it was inferred from  
271 the findings that 33.3% of the SSPT normal group developed aspiration pneumonia.  
272 Second, this study investigated subjects in a single institution, raising an issue with  
273 external validity. Further studies should include data from multiple institutions in  
274 combination with other screening methods to further improve the prediction accuracy.

275

276

### 277 **Conclusions**

278 This is the first prospective cohort study to examine the association between  
279 the swallowing reflex and the development of aspiration pneumonia in older patients  
280 with dysphagia (mean age 83.8 years) in LTC wards. The findings of this study suggest

281 that the abnormal of a swallowing reflex in the SSPT with 0.4 ml water was associated  
282 with the development of aspiration pneumonia, and the abnormal of a swallowing reflex  
283 could have 2.3 times the risk of developing aspiration pneumonia when compared with  
284 those the normal reflex. We concluded that SSPT could be a predictive factor for  
285 aspiration pneumonia in older LTC inpatients.

286

287

## 288 **Acknowledgments**

289 The authors thank all members of the Naruto-Yamakami Hospital for their  
290 help with this research. We also thank Helen Jeays, BDSc AE, from Edanz Group  
291 (<https://en-author-services.edanzgroup.com/ac>) for editing a draft of this manuscript.

292

293

294 **Data availability statement:** The data that support the findings of this study are  
295 available from the corresponding author, Omura, T., upon reasonable request.

296

297

## 298 **References**

- 299 1. Ikeda K, Takatoshi I. Historical Overview of Pneumonia Deaths in Japan  
300 Annual report of Tokyo Metropolitan Institute of Public Health 2018(69):271-7.
- 301 2. Hayashi M, Iwasaki T, Yamazaki Y, Takayasu H, Tateno H, Tazawa S et al.  
302 Clinical features and outcomes of aspiration pneumonia compared with non-aspiration  
303 pneumonia: a retrospective cohort study. Journal of infection and chemotherapy :  
304 official journal of the Japan Society of Chemotherapy 2014;20(7):436-42.
- 305 3. Hilker R, Poetter C, Findeisen N, Sobesky J, Jacobs A, Neveling M et al.  
306 Nosocomial pneumonia after acute stroke: implications for neurological intensive care  
307 medicine. Stroke 2003;34(4):975-81.
- 308 4. Komiya K, Rubin BK, Kadota JI, Mukae H, Akaba T, Moro H et al. Prognostic  
309 implications of aspiration pneumonia in patients with community acquired pneumonia:  
310 A systematic review with meta-analysis. Scientific reports 2016;6:38097.
- 311 5. Yoon HY, Shim SS, Kim SJ, Lee JH, Chang JH, Lee SH et al. Long-Term  
312 Mortality and Prognostic Factors in Aspiration Pneumonia. Journal of the American  
313 Medical Directors Association 2019;20(9):1098-104.e4.
- 314 6. Manabe T, Teramoto S, Tamiya N, Okochi J, Hizawa N. Risk Factors for  
315 Aspiration Pneumonia in Older Adults. PloS one 2015;10(10):e0140060.
- 316 7. Masiero S, Pierobon R, Previato C, Gomiero E. Pneumonia in stroke patients

- 317 with oropharyngeal dysphagia: a six-month follow-up study. *Neurological sciences* :  
318 official journal of the Italian Neurological Society and of the Italian Society of Clinical  
319 Neurophysiology 2008;29(3):139-45.
- 320 8. Sue Eisenstadt E. Dysphagia and aspiration pneumonia in older adults. *Journal*  
321 *of the American Academy of Nurse Practitioners* 2010;22(1):17-22.
- 322 9. van der Maarel-Wierink CD, Vanobbergen JN, Bronkhorst EM, Schols JM, de  
323 Baat C. Risk factors for aspiration pneumonia in frail older people: a systematic  
324 literature review. *Journal of the American Medical Directors Association*  
325 2011;12(5):344-54.
- 326 10. Martino R, Foley N, Bhogal S, Diamant N, Speechley M, Teasell R. Dysphagia  
327 after stroke: incidence, diagnosis, and pulmonary complications. *Stroke*  
328 2005;36(12):2756-63.
- 329 11. Arnold M, Liesirova K, Broeg-Morvay A, Meisterernst J, Schlager M, Mono  
330 ML et al. Dysphagia in Acute Stroke: Incidence, Burden and Impact on Clinical  
331 Outcome. *PloS one* 2016;11(2):e0148424.
- 332 12. Jukic Peladic N, Orlandoni P, Dell'Aquila G, Carrieri B, Eusebi P, Landi F et al.  
333 Dysphagia in Nursing Home Residents: Management and Outcomes. *Journal of the*  
334 *American Medical Directors Association* 2019;20(2):147-51.

- 335 13. Sakai K, Hirano H, Watanabe Y, Tohara H, Sato E, Sato K et al. An  
336 examination of factors related to aspiration and silent aspiration in older adults requiring  
337 long-term care in rural Japan. *Journal of oral rehabilitation* 2016;43(2):103-10.
- 338 14. Nakashima T, Maeda K, Tahira K, Taniguchi K, Mori K, Kiyomiya H et al.  
339 Silent aspiration predicts mortality in older adults with aspiration pneumonia admitted  
340 to acute hospitals. *Geriatrics & gerontology international* 2018;18(6):828-32.
- 341 15. Bours GJ, Speyer R, Lemmens J, Limburg M, de Wit R. Bedside screening  
342 tests vs. videofluoroscopy or fiberoptic endoscopic evaluation of swallowing to detect  
343 dysphagia in patients with neurological disorders: systematic review. *Journal of*  
344 *advanced nursing* 2009;65(3):477-93.
- 345 16. Brodsky MB, Suiter DM, Gonzalez-Fernandez M, Michtalik HJ, Frymark TB,  
346 Venediktov R et al. Screening Accuracy for Aspiration Using Bedside Water Swallow  
347 Tests: A Systematic Review and Meta-Analysis. *Chest* 2016;150(1):148-63.
- 348 17. Daniels SK, Anderson JA, Willson PC. Valid items for screening dysphagia risk  
349 in patients with stroke: a systematic review. *Stroke* 2012;43(3):892-7.
- 350 18. Ramsey DJ, Smithard DG, Kalra L. Early assessments of dysphagia and  
351 aspiration risk in acute stroke patients. *Stroke* 2003;34(5):1252-7.
- 352 19. Kagaya H, Okada S, Saitoh E, Baba M, Yokoyama M, Takahashi H. Simple

353 swallowing provocation test has limited applicability as a screening tool for detecting  
354 aspiration, silent aspiration, or penetration. *Dysphagia* 2010;25(1):6-10.

355 20. Teramoto S, Fukuchi Y. Detection of aspiration and swallowing disorder in  
356 older stroke patients: simple swallowing provocation test versus water swallowing test.  
357 *Archives of physical medicine and rehabilitation* 2000;81(11):1517-9.

358 21. Teramoto S, Matsuse T, Fukuchi Y, Ouchi Y. Simple two-step swallowing  
359 provocation test for elderly patients with aspiration pneumonia. *Lancet* (London,  
360 England) 1999;353(9160):1243.

361 22. Teramoto S, Yamamoto H, Yamaguchi Y, Ouchi Y, Matsuse T. A novel  
362 diagnostic test for the risk of aspiration pneumonia in the elderly. *Chest*  
363 2004;125(2):801-2.

364 23. Kamiya Y, Ichikawa H, Kuriki A, Shimizu Y, Saito Y, Kasai H et al. Evaluation  
365 of swallowing in acute ischemic stroke patients using both a simple swallowing  
366 provocation test and a water swallowing test. *Japanese Journal of Stroke*  
367 2010;32(3):254-60.

368 24. Minatani S, Ohta K, Muramoto S, Inoue T, Kanada Y. Evaluation of the  
369 screening tests for the aspiration pneumonitis in the care health center for the elderly.  
370 *The Journal of the Japan Society for Respiratory Care and Rehabilitation*

- 371 2008;18(1):59-65.
- 372 25. Igarashi A, Yamamoto-Mitani N, Morita K, Matsui H, Lai CKY, Yasunaga H.
- 373 Classification of long-term care wards and their functional characteristics: analysis of
- 374 national hospital data in Japan. *BMC health services research* 2018;18(1):655.
- 375 26. Kohno S, Imamura Y, Shindo Y, Seki M, Ishida T, Teramoto S et al. Clinical
- 376 practice guidelines for nursing- and healthcare-associated pneumonia (NHCAP)
- 377 [complete translation]. *Respiratory investigation* 2013;51(2):103-26.
- 378 27. Ishida T, Tachibana H, Ito A, Yoshioka H, Arita M, Hashimoto T. Clinical
- 379 characteristics of nursing and healthcare-associated pneumonia: a Japanese variant of
- 380 healthcare-associated pneumonia. *Internal medicine (Tokyo, Japan)*
- 381 2012;51(18):2537-44.
- 382 28. Matsumura T, Oki Y, Mitani Y, Takahashi M, Fujimoto Y, Ishikawa A.
- 383 Development of nursing and healthcare-associated pneumonia among cerebrovascular
- 384 disorder patient in long-term care facility. *The Journal of the Japan Society for*
- 385 *Respiratory Care and Rehabilitation* 2013;23(3):284-7.
- 386 29. Mann G. *MASA: The Mann Assessment of Swallowing Ability*. New York:
- 387 Cengage Learning; 2002.
- 388 30. Kunieda K, Ohno T, Fujishima I, Hojo K, Morita T. Reliability and validity of a



- 389 tool to measure the severity of dysphagia: the Food Intake LEVEL Scale. Journal of  
390 pain and symptom management 2013;46(2):201-6.
- 391 31. Bouillanne O, Morineau G, Dupont C, Coulombel I, Vincent JP, Nicolis I et al.  
392 Geriatric Nutritional Risk Index: a new index for evaluating at-risk elderly medical  
393 patients. The American journal of clinical nutrition 2005;82(4):777-83.
- 394 32. Chalmers JM, King PL, Spencer AJ, Wright FA, Carter KD. The oral health  
395 assessment tool--validity and reliability. Australian dental journal 2005;50(3):191-9.
- 396 33. Baba Y, Teramoto S, Hasegawa H, Machida A, Akishita M, Toba K.  
397 [Characteristics and limitation of portable bedside swallowing test in elderly with  
398 dementia: comparison between the repetitive saliva swallowing test and the simple  
399 swallowing provocation test]. Nihon Ronen Igakkai zasshi Japanese journal of geriatrics  
400 2005;42(3):323-7.
- 401 34. Langmore SE, Skarupski KA, Park PS, Fries BE. Predictors of aspiration  
402 pneumonia in nursing home residents. Dysphagia 2002;17(4):298-307.
- 403 35. Mitani Y, Oki Y, Fujimoto Y, Yamaguchi T, Yamada Y, Yamada K et al.  
404 Relationship between the Functional Independence Measure and Mann Assessment of  
405 Swallowing Ability in hospitalized patients with pneumonia. Geriatrics & gerontology  
406 international 2018;18(12):1620-4.

407 36. Ministry of Health LaW. About examination about the way of medical  
408 treatment bed [cited 2020 15 February]. Available from: URL:  
409 <https://www.mhlw.go.jp/stf/shingi2/0000145095.html>.

410 37. Warnecke T, Teismann I, Meimann W, Olenberg S, Zimmermann J, Kramer C  
411 et al. Assessment of aspiration risk in acute ischaemic stroke--evaluation of the simple  
412 swallowing provocation test. Journal of neurology, neurosurgery, and psychiatry  
413 2008;79(3):312-4.

414

415

416

### Suppliers

417 a. 5Fr atom feeding catheter; Atom Medical Corporation, 3-18-15, Hongo, Bunkyo-ku ,  
418 Tokyo to, 113-0033, Japan

419 b. IBM SPSS Statistics version 25; IBM Japan, 19-21, Nihombashihakozakicho,  
420 Chuo-ku , Tokyo to, 103-8510, Japan
